# Supplementary material for: NPM/ALK mutants resistant to ASP3026 display variable sensitivity to alternative ALK inhibitors but succumb to the novel compound PF-06463922
Source: Oncotarget. 2015 Jan 30;6(8):5720–34. doi: 10.18632/oncotarget.3122 (PMC4467397; doi:10.18632/oncotarget.3122)
Supplement: Supplementary file 1 [file oncotarget-06-5720-s001.pdf]

# SUPPLEMENTARY FIGURES AND TABLES

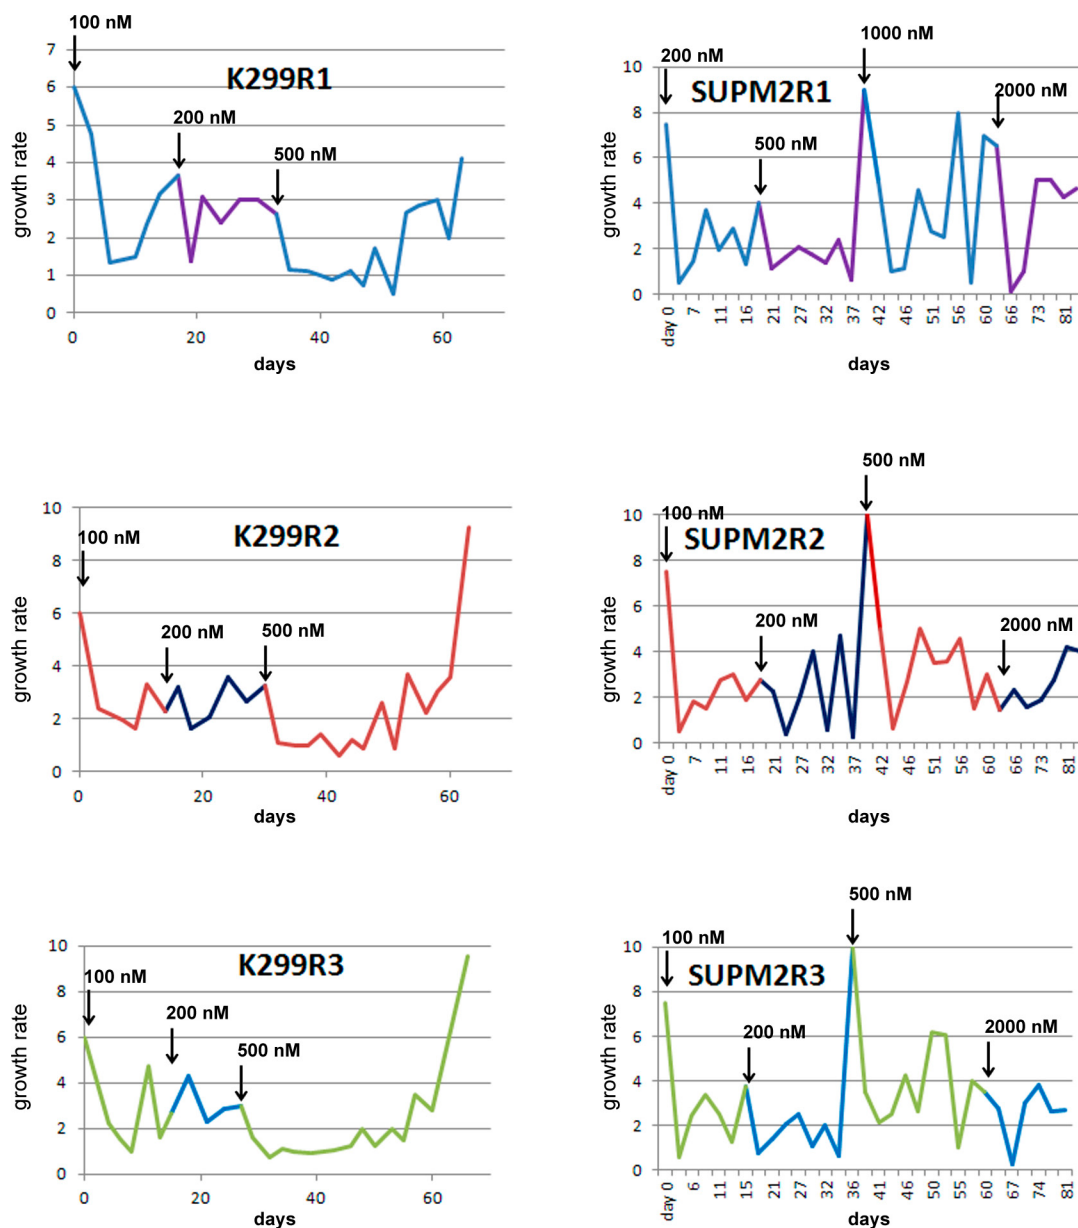

**Supplementary Figure S1: Growth rates of cell cultures under drug selection.** Growth rate was calculated as the variation in cellular concentration during each time interval. Arrows indicate the time of shift in drug concentration. The curves change color at each drug increase, to facilitate reading.

**A**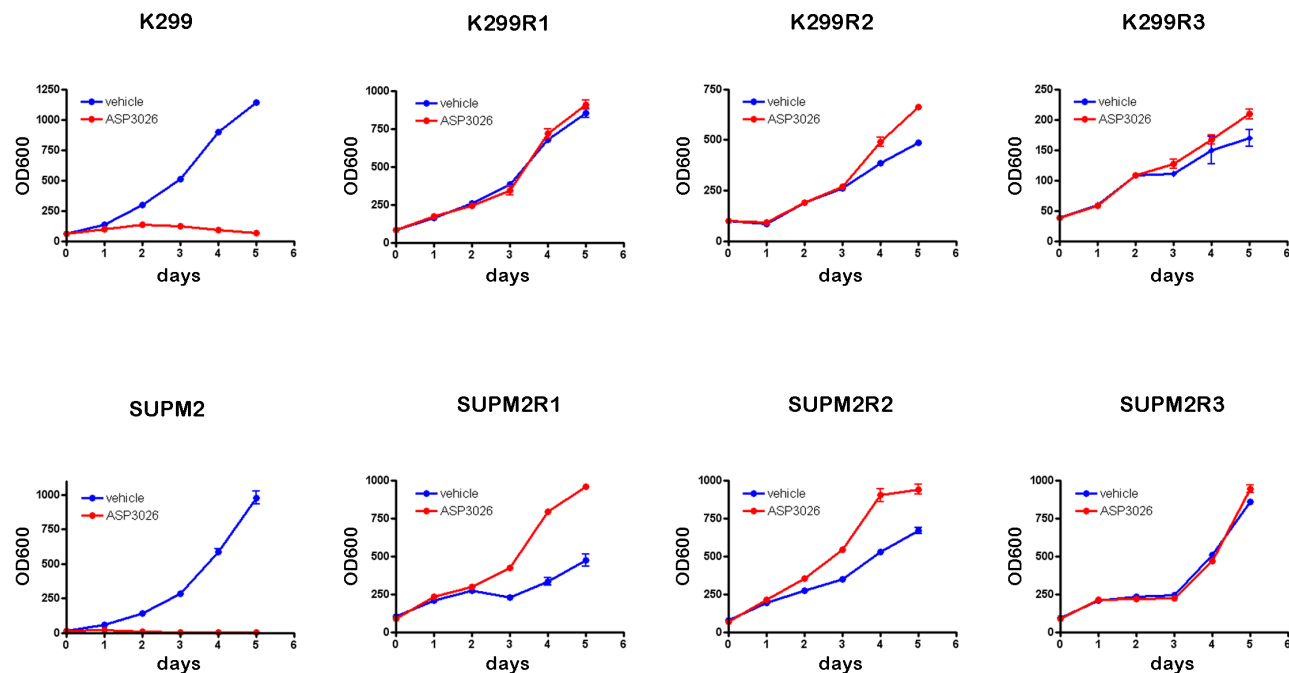**B**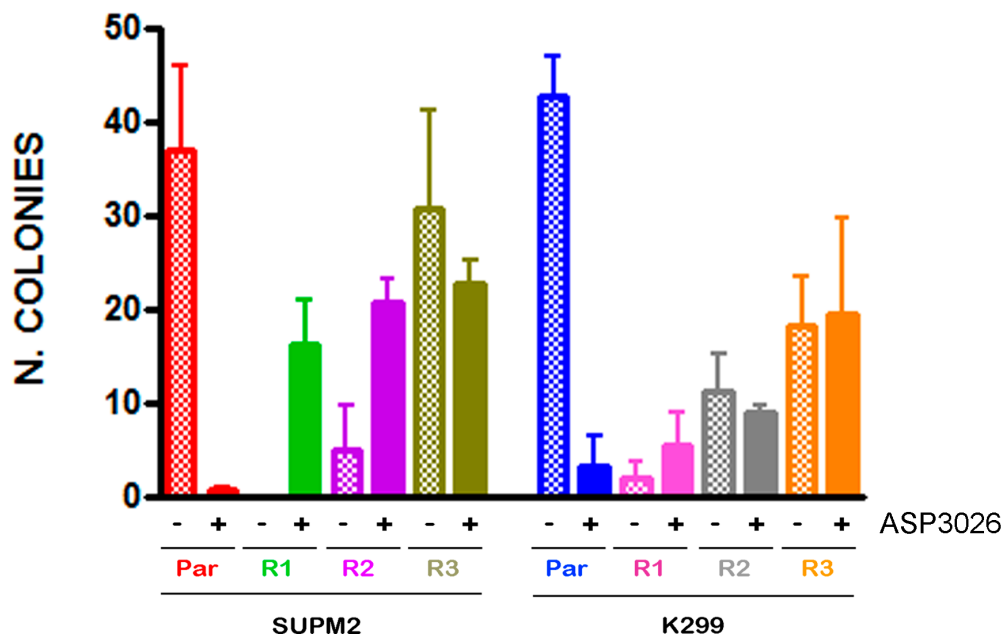

**Supplementary Figure S2: Growth properties of parental and ASP3026-resistant SUPM2 and K299 cells. (A)** In vitro growth kinetics in liquid culture. A time-course MTS viability assay was run in the absence (blue lines) or in the presence (red lines) of ASP3026. **(B)** Anchorage-independent growth was investigated by soft-agar colony assay with (solid bars) or without (cross-hatched bars) ASP3026. The data represent two independent experiments.

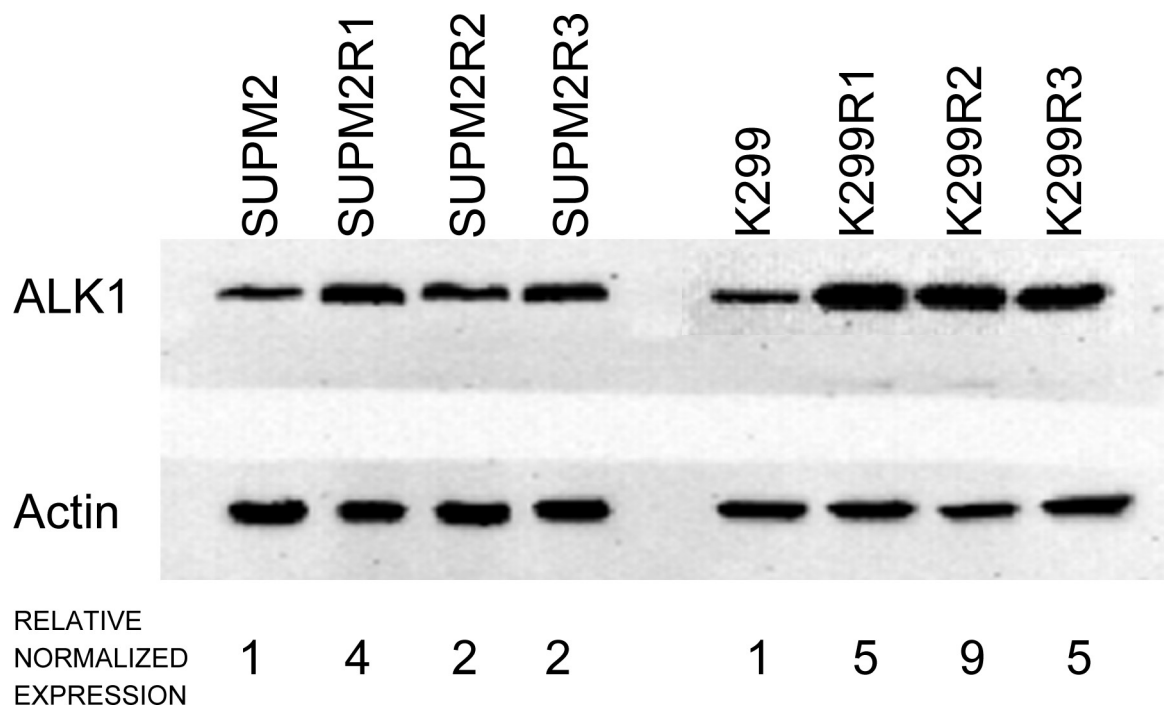

**Supplementary Figure S3: Western blot analysis of ALK expression in ASP3026-resistant cells.** Total cell lysates were probed with ALK1 antibody (ref. 47). Actin is shown as a loading control. Densitometry analysis of relative band intensity is shown below the blot.

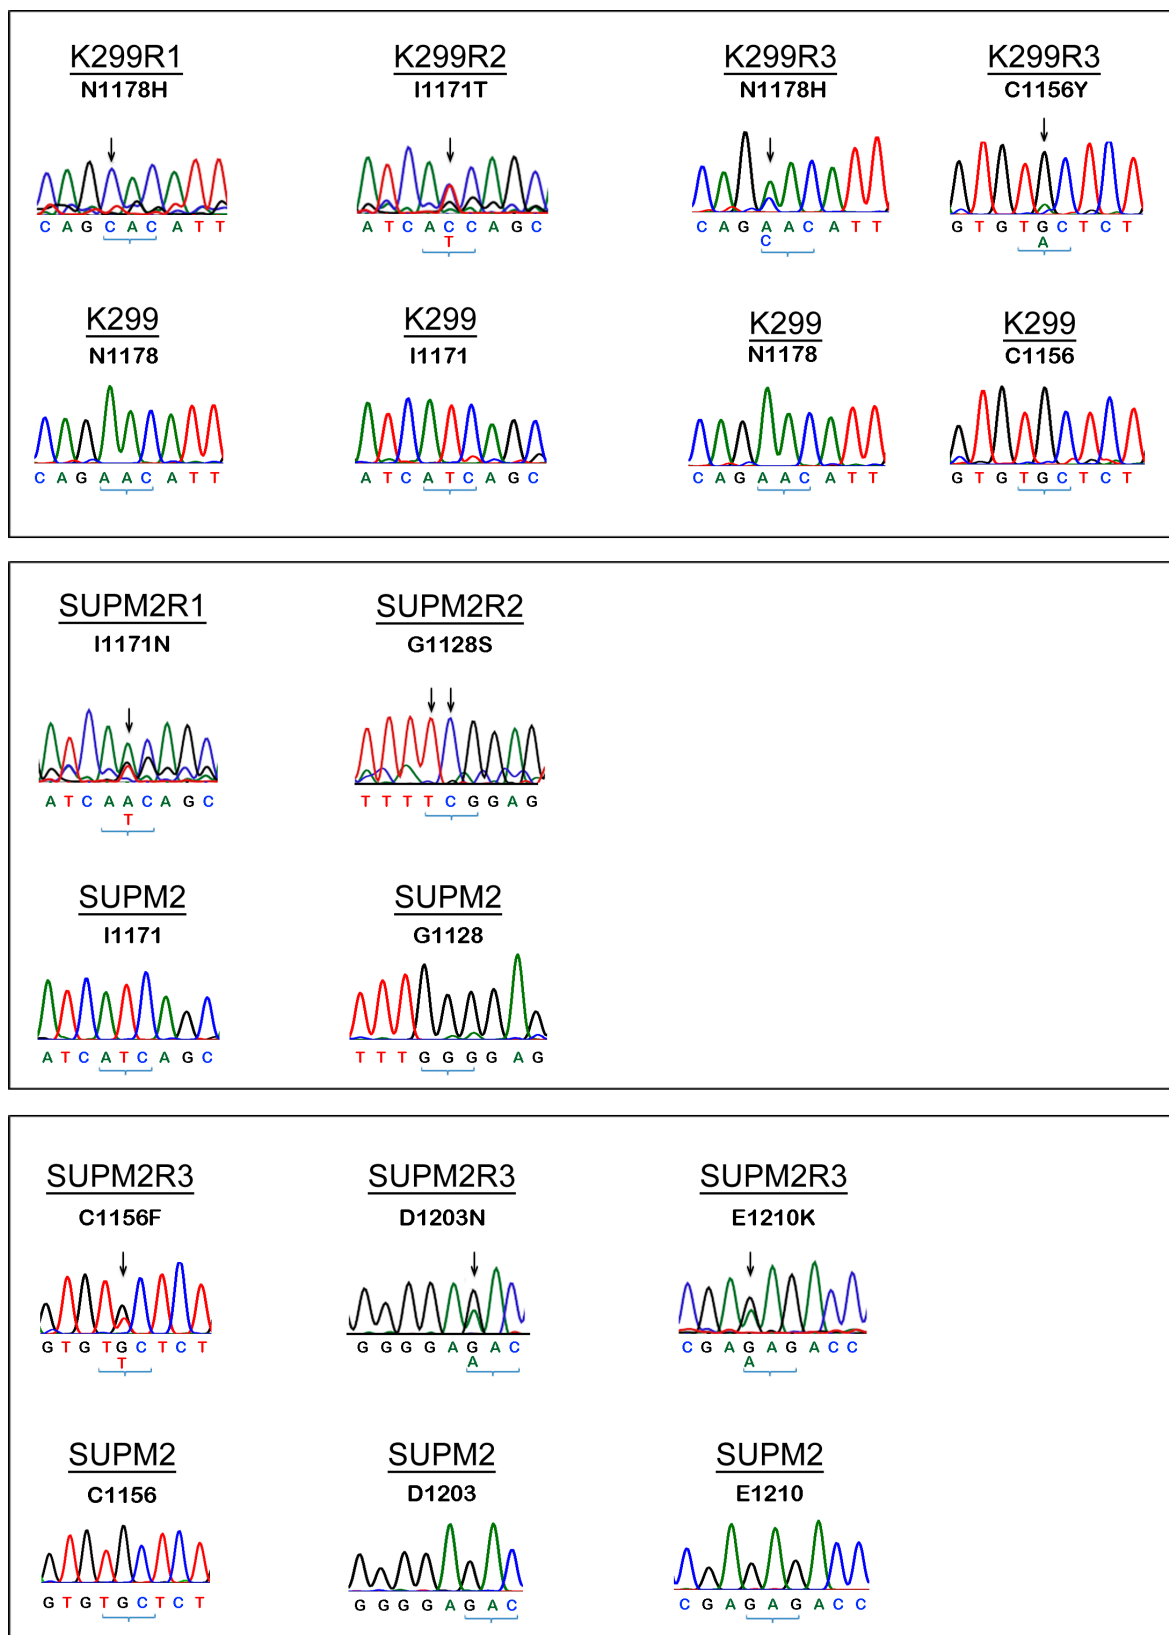

**Supplementary Figure S4: Chromatograms representative of mutations found in ASP3026-resistant cells.** The corresponding sequence from parental cells is shown below each mutant, for a comparison.

A

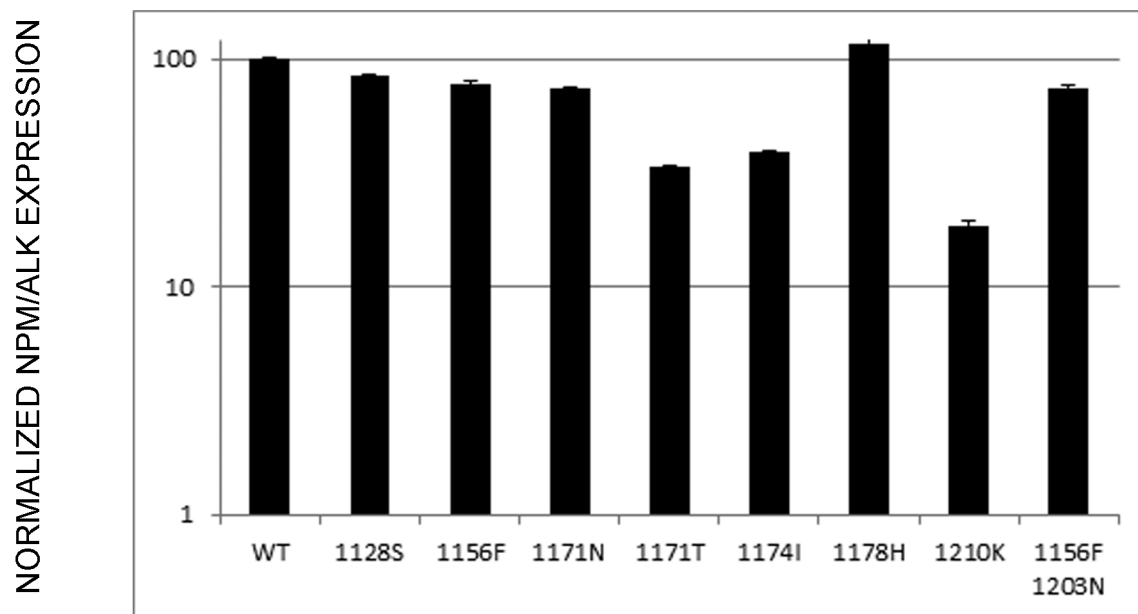

B

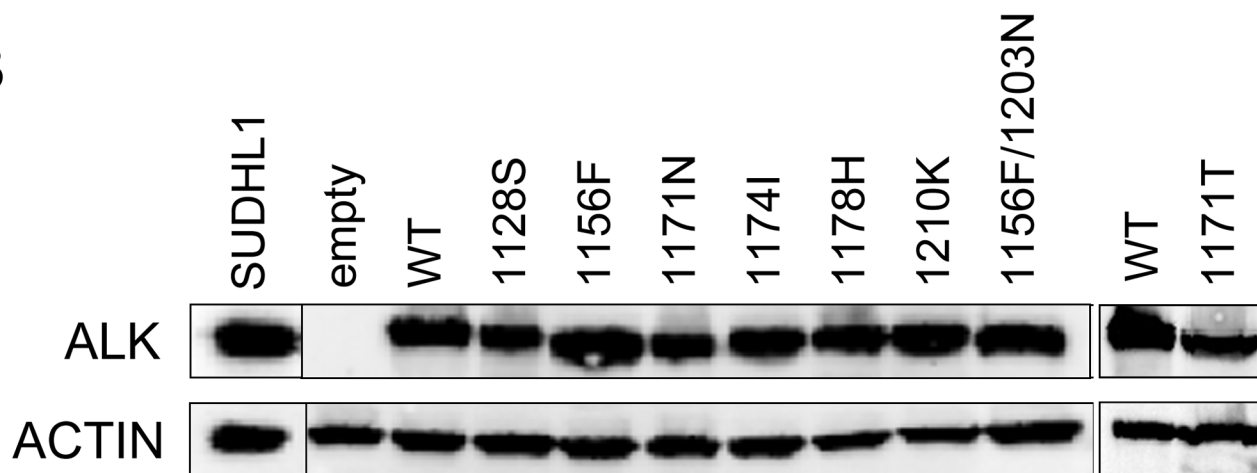

**Supplementary Figure S5: Ectopic expression of NPM/ALK mutants in transfected Ba/F3 cells.** at RNA (A) and protein (B) level. SUDHL1 lysate was run in parallel for a comparison. A line is drawn where the gel was cut. The 1171T mutant was run on a separate gel alongside WT.

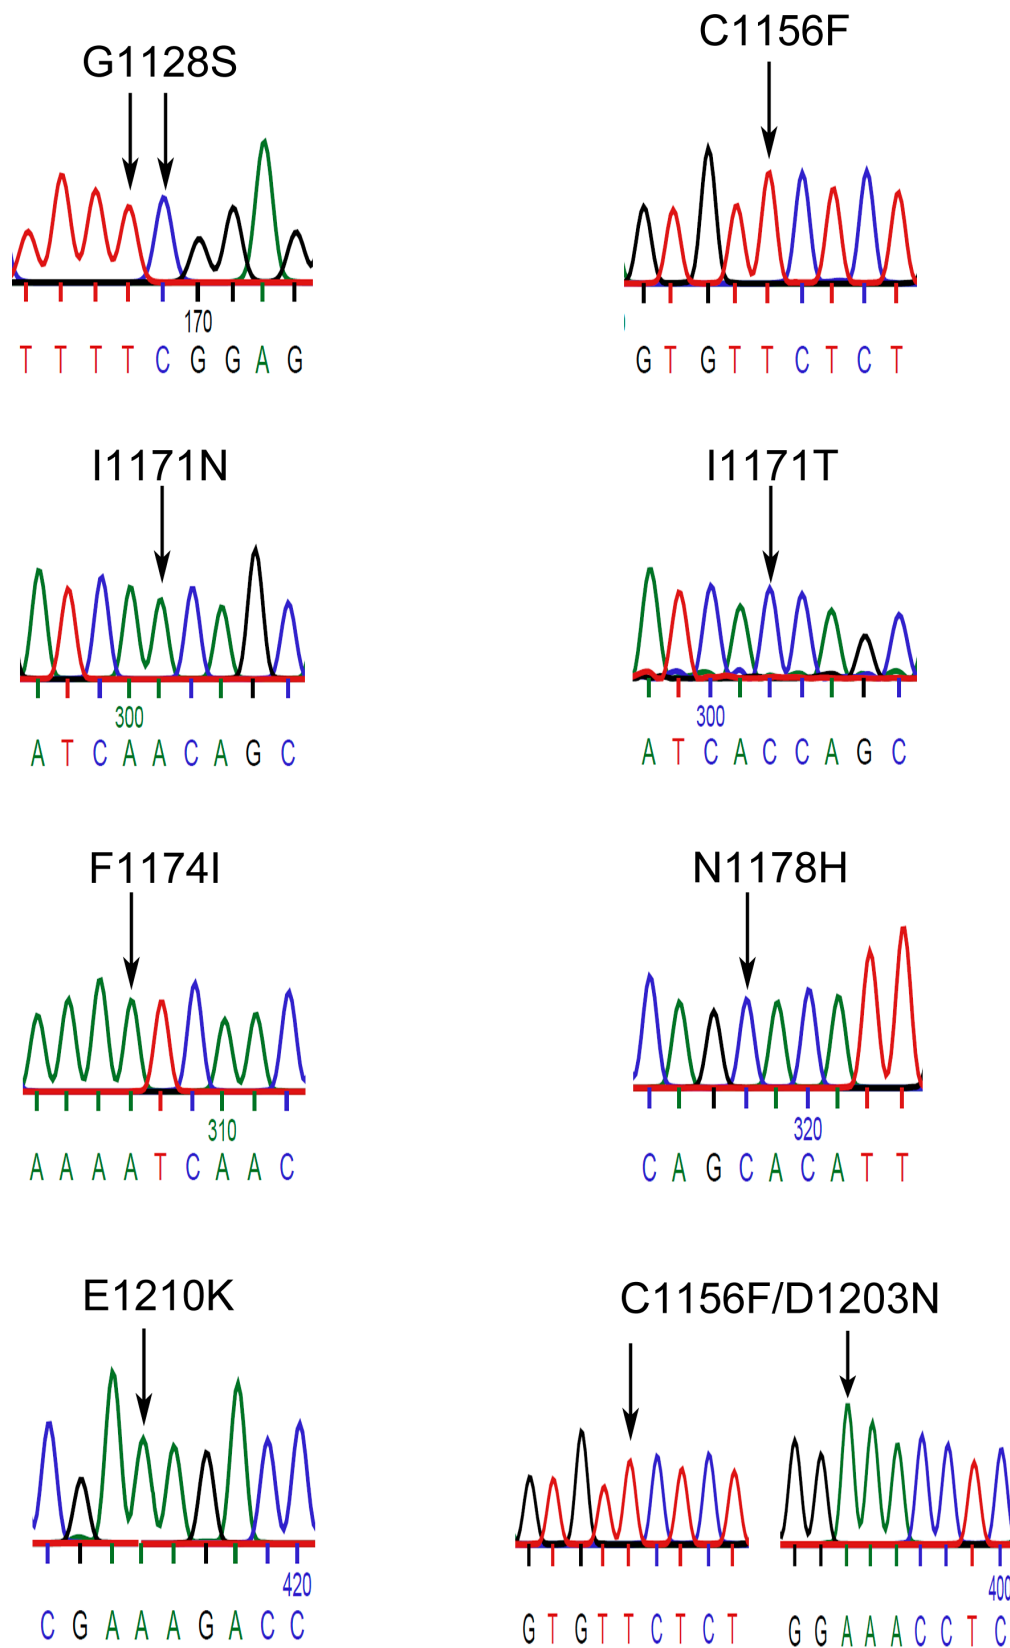

Supplementary Figure S6: Sequencing of mutant N/A expressed in the various Ba/F3 transfected cell lines.

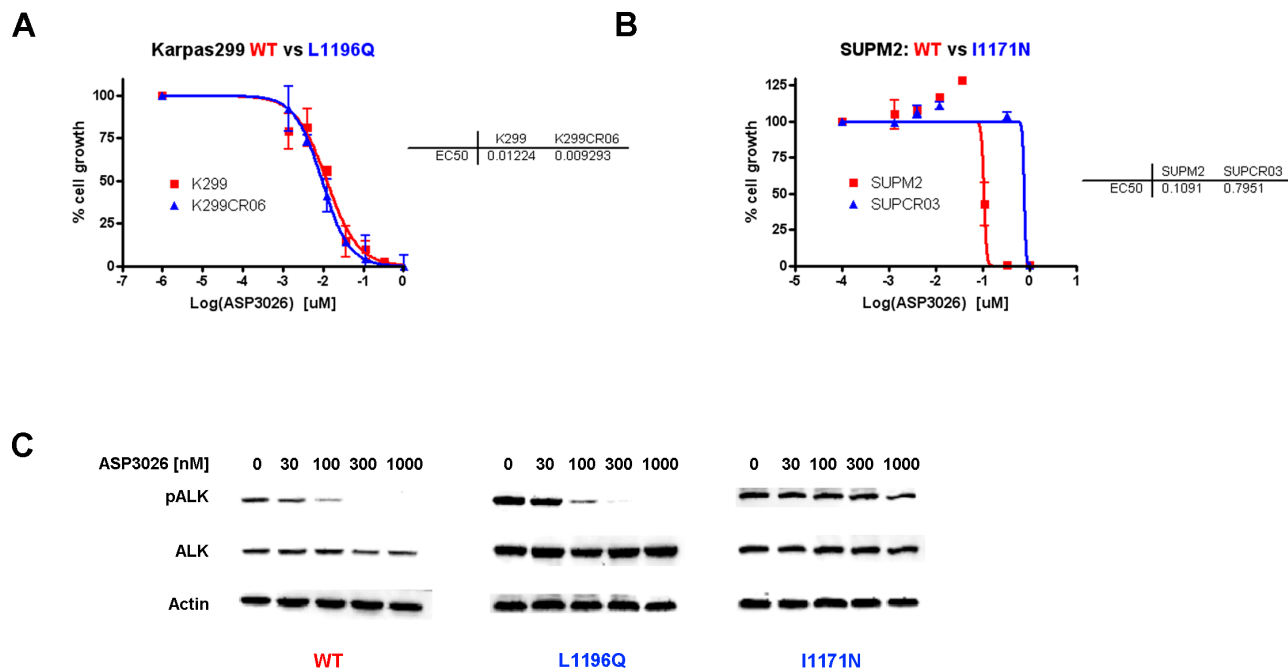

**Supplementary Figure S7: Analysis of cross-resistance to ASP3026 of previously described crizotinib-resistant cell lines (ref. 12).** Cells carrying the L1196Q substitution are fully sensitive to ASP3026, while they showed  $40 \times$  RR to crizotinib in the original report, supporting non-overlapping resistance profiles. Cells with the 1171N mutation, by contrast, show a similar degree of resistance to both drugs (7-fold) in line with this mutant being selected in both cases.

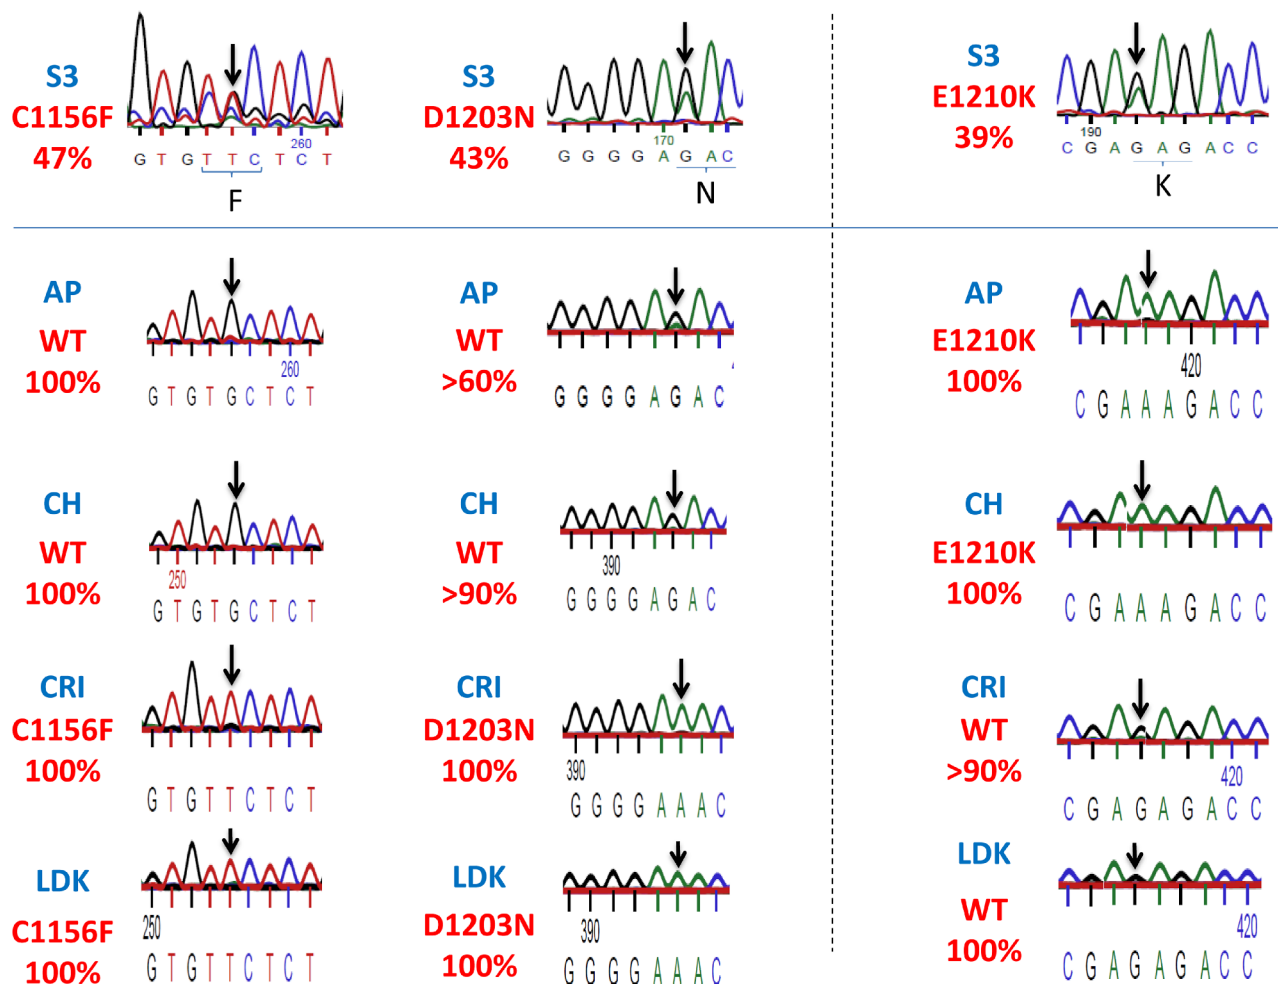

**Supplementary Figure S8: Sequencing of second-line treatment-resistant cells.** SUPM2R3 sequence (pre-treatment) is reported at the top. The sequence of the corresponding regions after second-line treatments is shown below the line. Arrows point at the mutated nucleotides.

**A**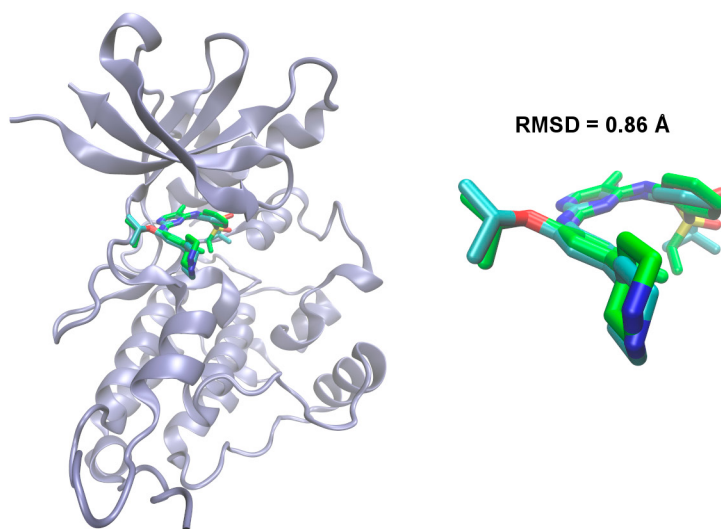**B**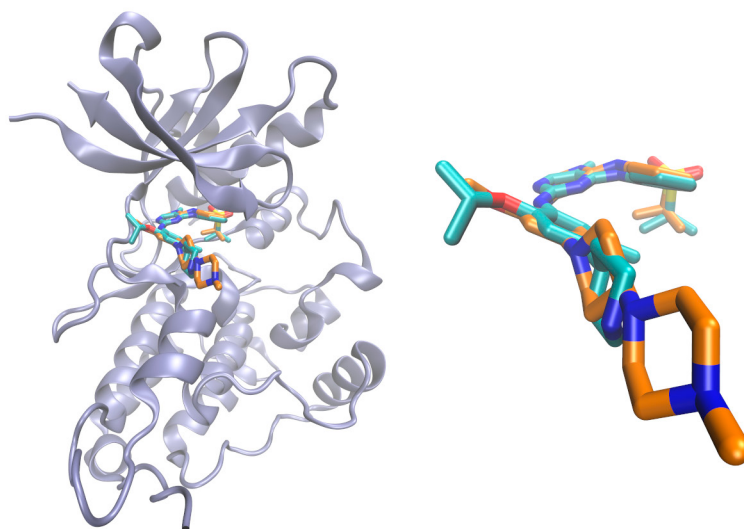

**Supplementary Figure S9: Validation of the docking protocol.** (A) Overlap of the crystallographic pose of ceritinib (C atoms in cyan) and its docking pose (C atoms in green) within the active site of ALK (PDB code: 4MKC). (B) Overlap of the crystallographic pose of ceritinib (C atoms in cyan) and the low energy docking pose of ASP3026 (C atoms in orange) within the active site of ALK (PDB code: 4MKC).

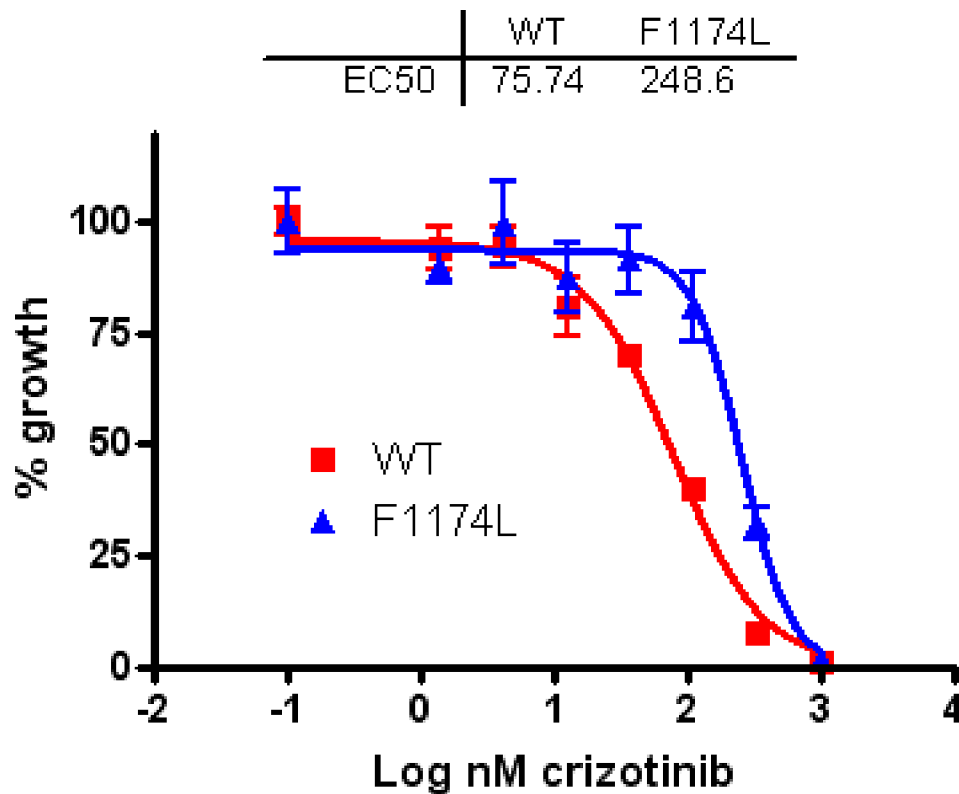

Supplementary Figure S10: Dose-response curves obtained by <sup>3</sup>H-Thymidine incorporation assay with Ba/F3-NPM/ALK wild-type and F1174L treated with crizotinib. IC<sub>50</sub> values are reported at the top of the graph.

Supplementary Table S1: NPM/ALK mutations detected at frequency >1% in the K299R3 cell line, by ultradeep sequencing of the ALK kinase domain.

| Nucleotide change | Aminoacid change | Mutated clones/total reads | Frequency (%) |
|-------------------|------------------|----------------------------|---------------|
| AAC -> CAC        | N1178H           | 3904/7890                  | 49.48         |
| TGC -> TAC        | C1156Y           | 1755/7641                  | 22.97         |
| CTG -> ATG        | L1196M           | 545/7988                   | 6.82          |
| ACG -> AAG        | T1151K           | 189/7931                   | 2.38          |
| CCG -> CAG        | P1215Q           | 179/7924                   | 2.26          |
| ATC -> AGC        | I1105S           | 73/5359                    | 1.36          |
| GAC -> GGC        | D1225G           | 102/7961                   | 1.28          |
| GAC -> GGC        | D1232G           | 84/7876                    | 1.07          |
| CGC -> CAC        | R1214H           | 76/7244                    | 1.05          |
| GCT -> CCT        | A1230P           | 82/7857                    | 1.04          |
| CTG -> CGG        | L1108R           | 82/7997                    | 1.03          |
| AAC -> ATC        | N1394I           | 79/7825                    | 1.01          |

**Supplementary Table S2: NPM/ALK mutations detected at frequency >1% in the SUPM2R3 cell line, by ultradeep sequencing of the ALK kinase domain.**

| Nucleotide change | Aminoacid change | Mutated clones/total reads | Frequency (%) |
|-------------------|------------------|----------------------------|---------------|
| TGC -> TTC        | C1156F           | 3563/7338                  | 48.56         |
| GAG -> AAG        | E1210K           | 3110/7993                  | 38.91         |
| GAC -> AAC        | D1203N           | 2830/7664                  | 36.93         |
| TTC -> ATC        | F1174I           | 784/7976                   | 9.83          |
| ATC -> AGC        | I1171S           | 389/7985                   | 4.87          |
| ATT -> ATG        | I1119M           | 256/7992                   | 3.20          |
| TTC -> TGC        | F1174C           | 184/7977                   | 2.31          |
| ACG -> ATG        | T1151M           | 173/7792                   | 2.22          |
| TCC -> CCC        | S1219P           | 112/7986                   | 1.40          |
| GAG -> GGG        | E1129G           | 56/5428                    | 1.03          |
| TTC -> CTC        | F1193L           | 80/7988                    | 1.00          |

Note: deep-seq does not discriminate single from compound mutations.

**Supplementary Table S3: ALK inhibitors plasma concentrations reported in literature.**

| DRUG               | Dose             | Plasma concentration [nM] | References |
|--------------------|------------------|---------------------------|------------|
| <b>Crizotinib</b>  | 250 mg/kg BID    | 530-649 <sup>†</sup>      | 43, 44     |
| <b>Alectinib</b>   | 300 mg/kg BID    | 880-959 <sup>†</sup>      | 45         |
| <b>Ceritinib</b>   | 750 mg/kg QD     | 1400*                     | 20         |
| <b>AP26113</b>     | 180 mg/kg QD     | 1000-2000 <sup>†</sup>    | 34         |
| <b>PF-06463922</b> | 0.3-10 mg/kg BID | 250-2500 <sup>†</sup>     | 46         |

<sup>†</sup>trough plasma levels ( $C_{\text{trough}}$ ) in patients.

\*peak plasma levels ( $C_{\text{max}}$ ) in patients.

<sup>†</sup>peak plasma levels ( $C_{\text{max}}$ ) in mice.

**Supplementary Table S4: Oligonucleotides for site-directed mutagenesis.** The mutated nucleotides are underlined.

| Mutation      | Sense (5'-3')                                      | Antisense (5'-3')                                 |
|---------------|----------------------------------------------------|---------------------------------------------------|
| <b>G1128S</b> | GCCATGGCGCCTTT <u>TC</u> GGA<br>GGTGTATGAAG        | CTTCATACACCTCC <u>GAA</u><br>AAGGCGCCATGGC        |
| <b>C1156F</b> | GACGCTGCCTGAAGTGT <u>TC</u><br>TCTGAACAGGACGAAC    | GTTTCGTCCTGTTCAAGAG <u>AA</u><br>CACTTCAGGCAGCGTC |
| <b>I1171N</b> | CATGGAAGCCCTGATCA <u>AC</u><br>AGCAAATTCAACCACC    | GGTGGTTGAATTTGCTGT <u>T</u><br>GATCAGGGCTTCCATG   |
| <b>I1171T</b> | CATGGAAGCCCTGATCA <u>CC</u><br>AGCAAATTCAACCACC    | GGTGGTTGAATTTGCTGG <u>T</u><br>GATCAGGGCTTCCATG   |
| <b>F1174I</b> | GCCCTGATCATCAGCA <u>AAA</u><br>TCAACCACCAGAACATTG  | CAATGTTCTGGTGGTTGA <u>TT</u><br>TTGCTGATGATCAGGGC |
| <b>N1178H</b> | GCAAATTCAACCACCAG <u>C</u> A<br>CATTGTTTCGCTGCATTG | CAATGCAGCGAACAATGT <u>GC</u><br>TGGTGGTTGAATTTGC  |
| <b>D1203N</b> | CTCATGGCGGGGGGAA <u>AA</u><br>CCTCAAGTCCTTCC       | GGAAGGACTTGAGGT <u>TT</u><br>CCCCCGCCATGAG        |
| <b>E1210K</b> | CAAGTCCTTCCTCCGA <u>AA</u><br>GACCCGCCCTCGCCC      | GGGCGAGGGCGGGTCT <u>TT</u><br>CGGAGGAAGGACTTG     |
